# Supplementary material
Source: HighWire-hosted journal article supplement (http://erj.ersjournals.com/highwire/filestream/113336/field_highwire_adjunct_files/0/CME37-5onepage.pdf)
Supplement: CME37-5onepage.pdf [file CME37-5onepage.pdf]

# CME Credit Application Form

## (1 CME credit)

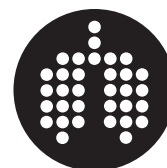

To receive CME credits, read the CME article in this issue, indicate the correct responses to the educational questions and complete the requested information. This form is also available in electronic format at [www.erj.ersjournals.com/current.dtl](http://www.erj.ersjournals.com/current.dtl). To return your application, you can either:

- use this form and return it completed to ERS Publications Office, 442 Glossop Road, Sheffield, S10 2PX, UK; fax to +44-114-2665064; or e-mail to [info@ersj.org.uk](mailto:info@ersj.org.uk)
- fill in the online form at [www.erj.ersjournals.com/current.dtl](http://www.erj.ersjournals.com/current.dtl)

Certificates will be e-mailed to the address filled in below. Please allow 4 weeks for processing.

**CME credit applications are now free of charge.**

### Applicant personal details.

ERS Membership No. (if known): ..... Date of Birth (DD/MM/YYYY): .....

Family Name: ..... First Name: .....

Mailing Address: .....

Postal Code: ..... City: ..... Country: .....

Telephone: + ..... E-mail: .....

### Educational questions.

**"Early treatment of obstructive apnoea and stroke outcome: a randomised controlled trial"**

For each statement, mark appropriately in every box with a (+) for true or (-) for false.

#### 1. Which of the following statements is true?

- Obstructive sleep apnoea (OSA) is a demonstrated risk factor for hypertension.  Nasal CPAP treatment does not have any effect on arterial pressure.  Hypertension fully explains the relation between OSA and stroke.  Higher pressures of nasal CPAP are needed in patients with stroke and OSA.

#### 2. Which of the following statements is true?

- There are no data showing that OSA may be a risk factor for stroke.  OSA can only be considered as a prognostic factor for stroke.  Central events are probably secondary to stroke.  Both obstructive and central events observed after stroke are just a consequence of the latter.

#### 3. Related to treatment with nasal CPAP in patients with stroke and OSA, consider which of the following statements is true:

- Nasal CPAP treatment in stroke patients is not feasible.  Nasal CPAP treatment reduces mortality and recurrences as shown by randomised controlled trials.  Nasal CPAP has deleterious effects in neurological recovery.  Some patients require facial masks because of leaks.

#### 4. Which of the following statements is false?

- OSA can be a prognostic factor for stroke patients.  It is not worthy to study older people with stroke, since they have higher AHI induced by age.  Several mechanisms could explain the relationship between OSA and stroke.  There is, in general, a lack of somnolence in patients with stroke although having high AHI.
